# Supplementary material for: Probing how Ti- and Nb-substitution affect the stability and improve the electrochemical performance of β- and ε-LiVOPO4
Source: Royal Society of Chemistry journal article supplement (doi:10.1039/d2ta08184a), 2023-01-01
Supplement: d2ta08184a1.pdf [file d2ta08184a1.pdf]

ARTICLE

Electronic Supplementary Information

Table S1. Calculated dopant formation energies shown in Fig. 8.

| $E_f$ (eV/dopant)    | 3.125% | 6.25% | 9.375% | 12.5%  |
|----------------------|--------|-------|--------|--------|
| Nb ( $\beta$ )       | 1.06   | 0.79  | 0.70   | 0.63   |
| Nb ( $\varepsilon$ ) | 0.40   | 0.29  | 0.25   | 0.18   |
| Ti ( $\beta$ )       | 0.43   | 0.20  | 0.13   | 0.0074 |
| Ti ( $\varepsilon$ ) | 0.105  | 0.056 | 0.039  | -0.023 |

Table S2. ICP data of Ti- and Nb-substituted  $\text{LiVOPO}_4 \cdot 2\text{H}_2\text{O}$ , relative to P.

| % Subs from synthesis | Ti    |       |       |       | Nb    |       |       |       |
|-----------------------|-------|-------|-------|-------|-------|-------|-------|-------|
|                       | Li    | V     | P     | Ti    | Li    | V     | P     | Nb    |
| 0                     | 1.031 | 1.003 | 1.000 |       |       |       |       |       |
| 1                     | 0.971 | 0.965 | 1.000 | 0.012 | 0.964 | 1.006 | 1.000 | 0.008 |
| 2.5                   | 1.023 | 1.011 | 1.000 | 0.031 | 0.927 | 0.990 | 1.000 | 0.027 |
| 5                     | 0.981 | 0.962 | 1.000 | 0.062 | 0.935 | 0.951 | 1.000 | 0.077 |
| 10                    | 0.875 | 0.871 | 1.000 | 0.136 | 0.750 | 0.910 | 1.000 | 0.149 |
| 15                    |       |       |       |       | 0.445 | 0.774 | 1.000 | 0.270 |
| 20                    |       |       |       |       | 0.333 | 0.648 | 1.000 | 0.386 |

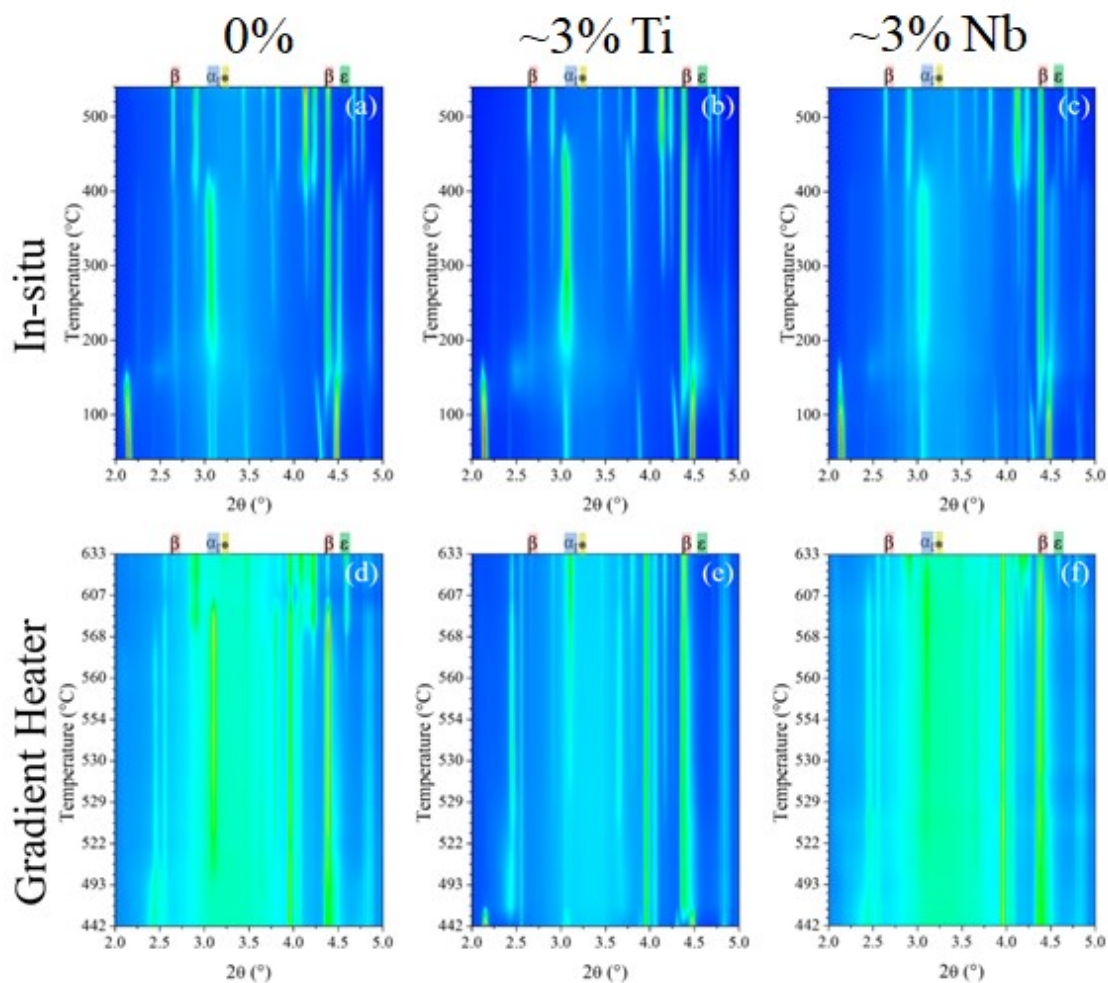

Fig. S1. Comparison of XRD while heating pristine and substituted  $\text{LiVOPO}_4 \cdot 2\text{H}_2\text{O}$  in  $\text{O}_2$  via (a-c) the in-situ method or (d-f) the gradient heater method.

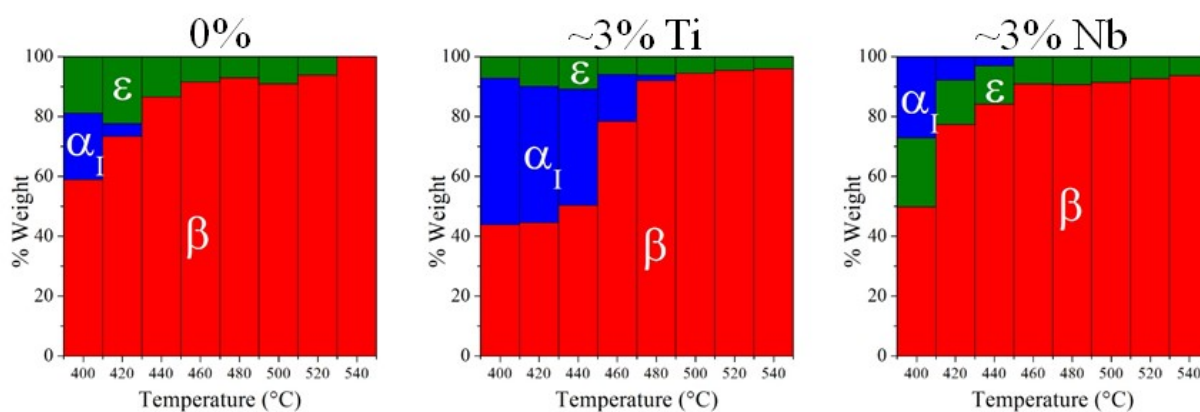

Fig. S2. Phase quantification from in-situ heating in  $\text{O}_2$  with XRD comparing pristine and substituted  $\text{LiVOPO}_4 \cdot 2\text{H}_2\text{O}$ .

Table S3. Values for  $\alpha$  from EIS fittings of the Warburg impedance using a CPE.

| Sample | $\alpha$ (ideal value is 0.5) |       |       | Angle (ideal value is 45 °) |        |        |
|--------|-------------------------------|-------|-------|-----------------------------|--------|--------|
|        | Pristine                      | 1% Nb | 3% Ti | Pristine                    | 1% Nb  | 3% Ti  |
| 4.0 V  | 0.501                         | 0.249 | 0.509 | 45.09                       | 22.41  | 45.81  |
| 3.4 V  | 0.6136                        | 0.551 | 0.653 | 55.224                      | 49.59  | 58.77  |
| 1.6 V  | 0.501                         | 0.431 | 0.432 | 45.09                       | 38.826 | 38.853 |

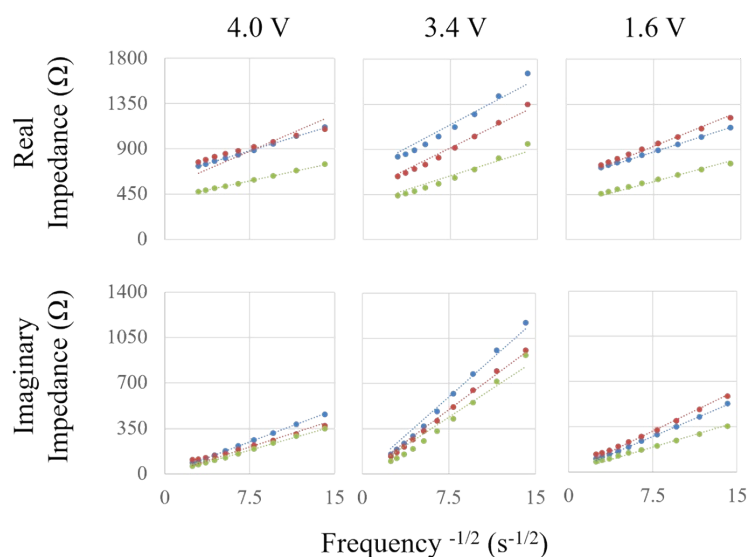Fig. S3. Plots of frequency<sup>-1/2</sup> vs either the real or imaginary impedance of the linear, low-frequency regions of the EIS for calculating the Warburg coefficients for the (blue) pristine, (red) 1% Nb-substituted, and (green) 3% Ti-substituted  $\beta$ -LiVOPO<sub>4</sub>.Table S4. Linear fitting values for the plots in Fig. S3; m is the slope, b is the y-intercept, and R<sup>2</sup> is the linear regression goodness of fit. The slopes are equal to the Warburg coefficients of those samples.

| Impedance | Subs  | 4.0 V |       |                | 3.4 V |       |                | 1.6 V |       |                |
|-----------|-------|-------|-------|----------------|-------|-------|----------------|-------|-------|----------------|
|           |       | m     | b     | R <sup>2</sup> | m     | b     | R <sup>2</sup> | m     | b     | R <sup>2</sup> |
| Real      | Pris  | 34.3  | 623.0 | 0.998          | 61.3  | 685.3 | 0.952          | 37.1  | 597.6 | 0.997          |
|           | 1% Nb |       |       |                | 56.8  | 488.1 | 0.980          | 46.9  | 578.3 | 0.981          |
|           | 3% Ti | 24.1  | 401.5 | 0.998          | 36.6  | 363.3 | 0.937          | 31.1  | 346.5 | 0.971          |
| Imaginary | Pris  | 32.8  |       | 0.999          | 79.3  |       | 0.985          | 36.9  |       | 0.998          |
|           | 1% Nb |       |       |                | 66.4  |       | 0.993          | 42.1  |       | 0.990          |
|           | 3% Ti | 24.6  |       | 0.999          | 58.5  |       | 0.958          | 25.7  |       | 0.988          |

Table S5. Slopes of the (dis)charge profile right before conducting EIS measurements

| Voltage (V) | Slope of (dis)charge profile |       |       |
|-------------|------------------------------|-------|-------|
|             | Pristine                     | 1% Nb | 3% Ti |
| 4.0         | 1.59                         |       | 1.55  |
| 3.4         | -4.11                        | -3.89 | -4.78 |
| 1.6         | -1.24                        | -0.88 | -1.16 |

Calculation of the bulk Li<sup>+</sup> diffusion coefficient ( $D_W$ ) is then calculated using the following equation proposed by Ho *et al.*<sup>1</sup>

$$D_W = \frac{1}{2} \left( \frac{V_M}{zFa\sigma} \right)^2 \left( \frac{dE}{dx} \right)^2$$

where  $D_W$  is the bulk Li<sup>+</sup> diffusion coefficient,  $V_M$  is the molar volume of  $\beta$ -LiVOPO<sub>4</sub> (50.61 cm<sup>3</sup>/mol),  $z$  is the number of electrons transferred during the reaction (1 e<sup>-</sup>),  $F$  is Faraday's constant,  $a$  is the electrode surface area (1.2 cm<sup>2</sup>),  $\sigma$  is the Warburg coefficient (Table S4), and  $dE/dx$  is the slope of the cycling profile ( $x$  in Li <sub>$x$</sub> VOPO<sub>4</sub> vs  $V$ ) right before taking EIS measurements (Table S5).

## References in ESI

1. C. Ho, I. D. Raistrick and R. A. Huggins, *Journal of The Electrochemical Society*, 1980, **127**, 343.
